# Supplementary material
Source: PubMed Central journal article supplement (PMC5088612)
Supplement: NIHMS758054-supplement.pdf [file NIHMS758054-supplement.pdf]

## INVENTORY OF SUPPLEMENTAL MATERIALS

### 1. Supplemental Figures and Legends

|                                      |                                                                                           |
|--------------------------------------|-------------------------------------------------------------------------------------------|
| Fig. S1 (supplemental to Fig 2)      | Chemokines that Recruit Ly6c <sup>hi</sup> cells are Up-regulated during Infection        |
| Fig. S2 (supplemental to Fig 4)      | DsRed Reporter Strain Features and their use in Interrogating the Host Pathogen Encounter |
| Fig. S3A+B (supplemental to Fig 5+6) | Activity of Human Macrophages and Neutrophils against Yeast <i>in vitro</i>               |
| Fig. S4 (supplemental to Fig 3)      | Role of GM-CSF in Control of Yeast <i>in vivo and in vitro</i>                            |
| FIG. S5 (supplemental to Fig 6)      | Activation and Action of Murine Neutrophils against Yeast                                 |
| Fig. S6 (supplemental to Fig 1+6)    | Impact of Ly6C <sup>hi</sup> Monocytes on Leukocyte Killing of Yeast                      |
| Fig. S7 (supplemental to Fig 7)      | Whole Protein Alignment of the Primary Amino Acid Sequences of Human and Fungal DppIV     |

### 2. Supplemental Experimental Procedures

### 3. Supplemental References

**Figure S1**

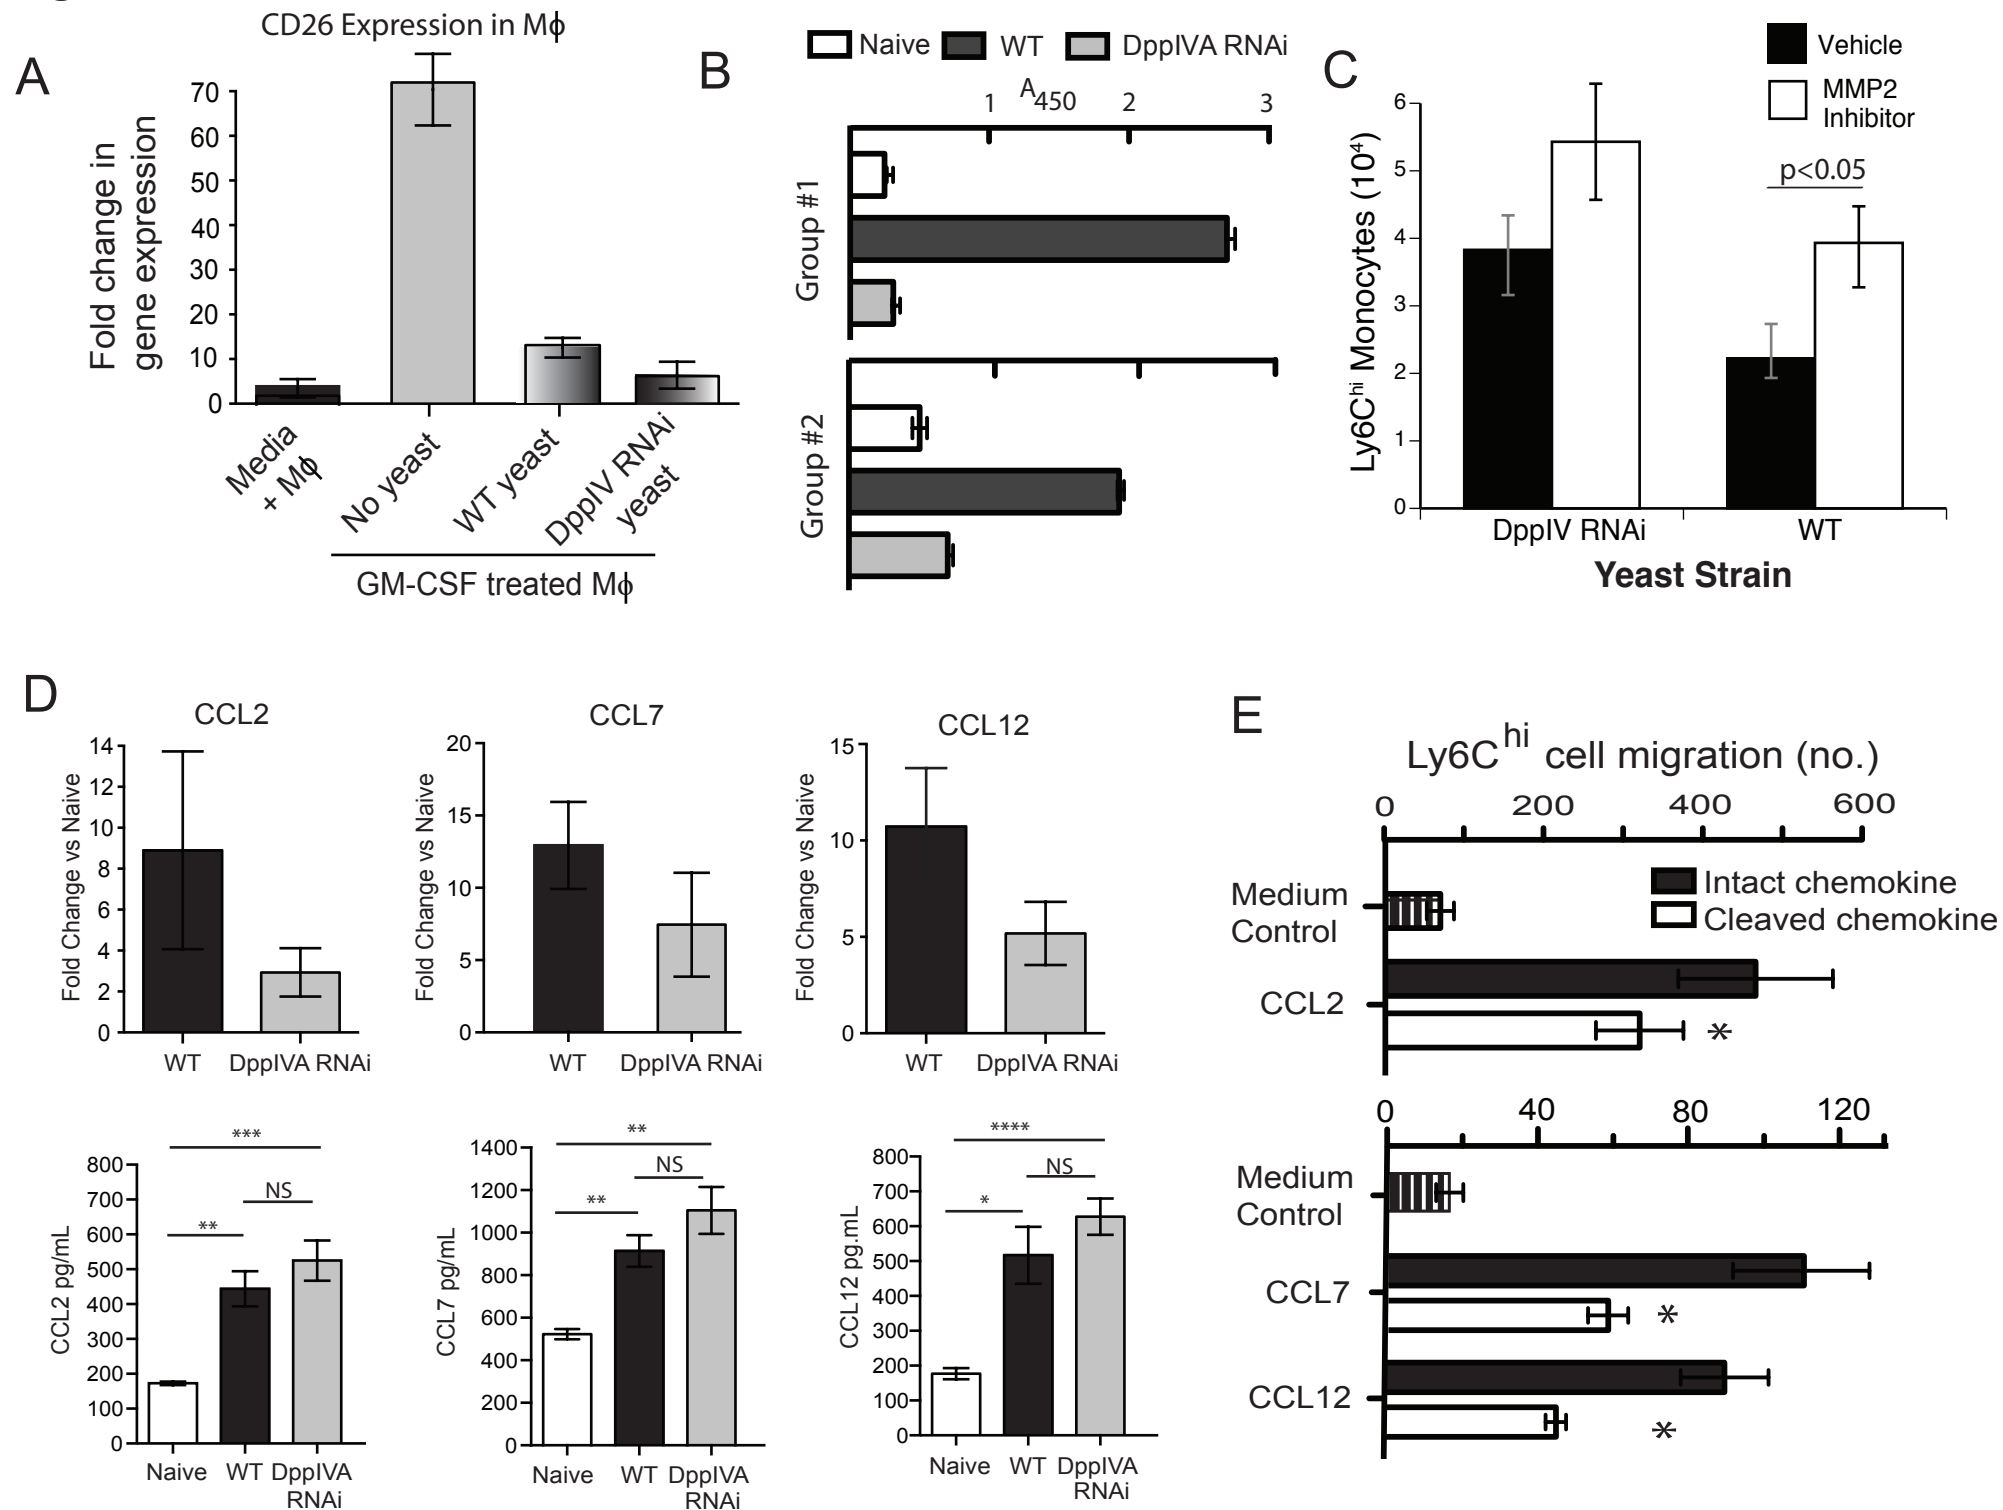

Figure S2

A

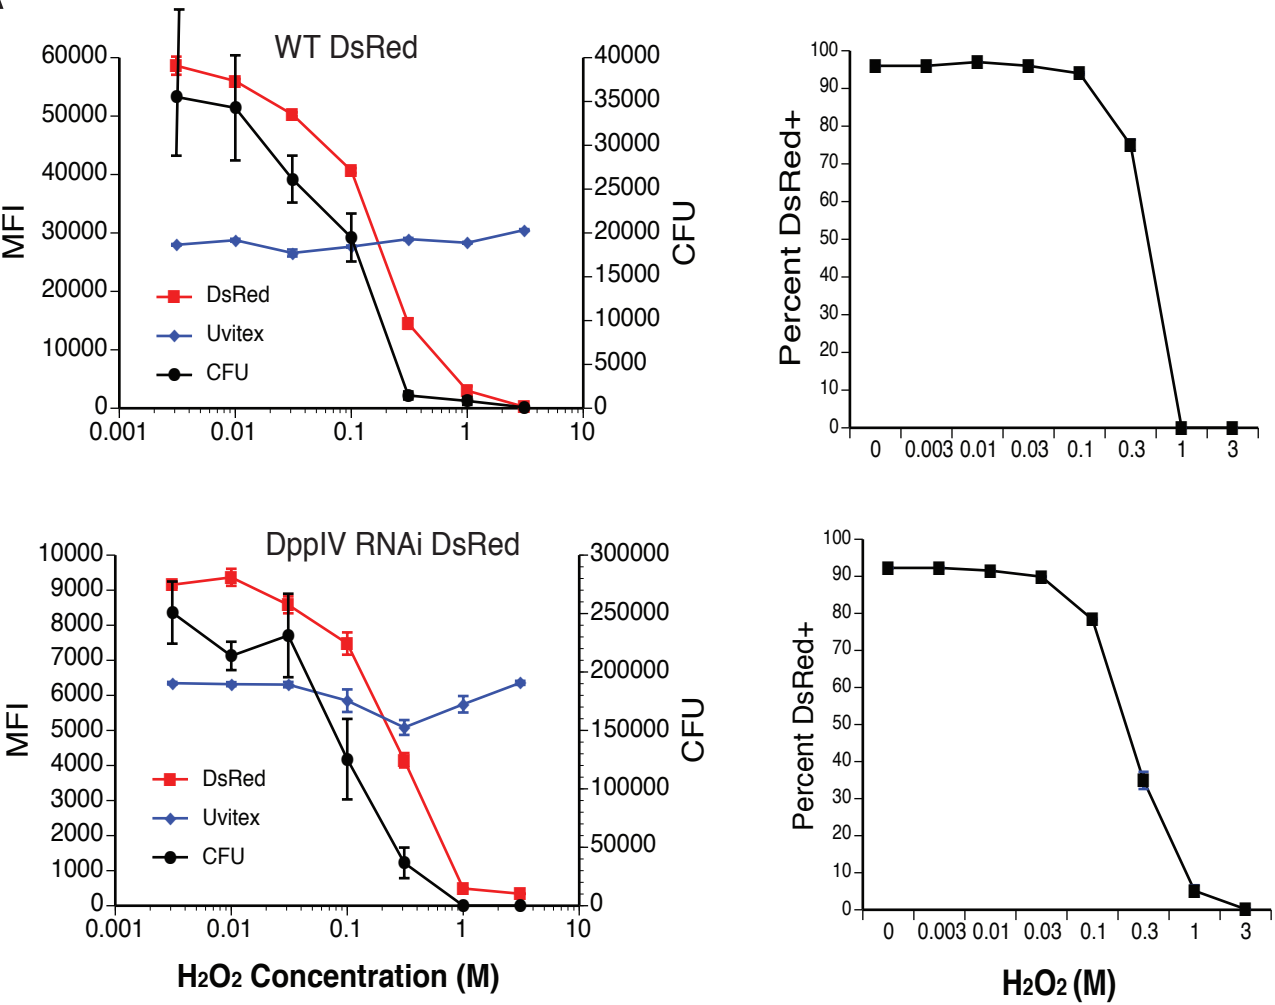

B

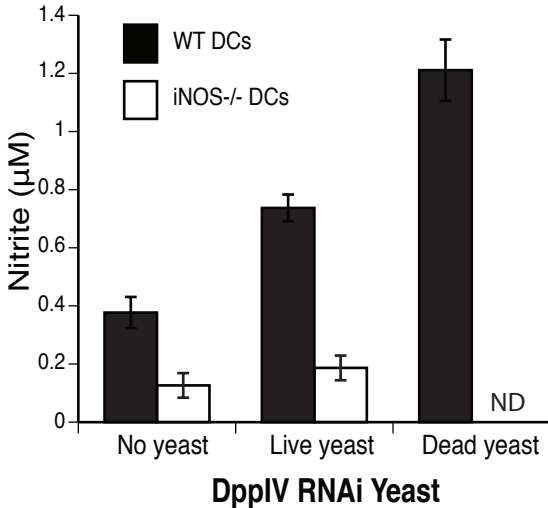

**Figure S3**

**A**

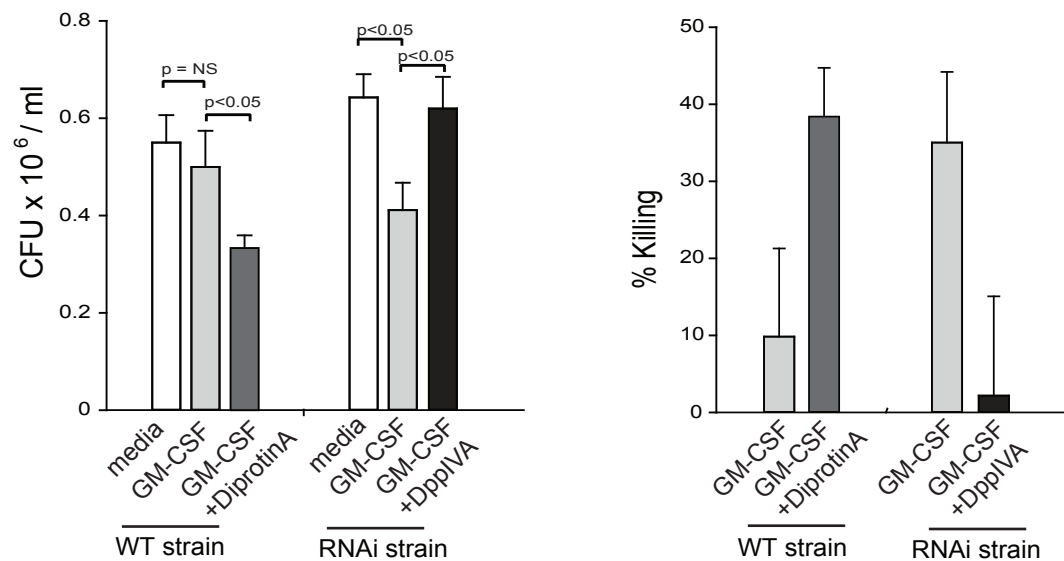

**B**

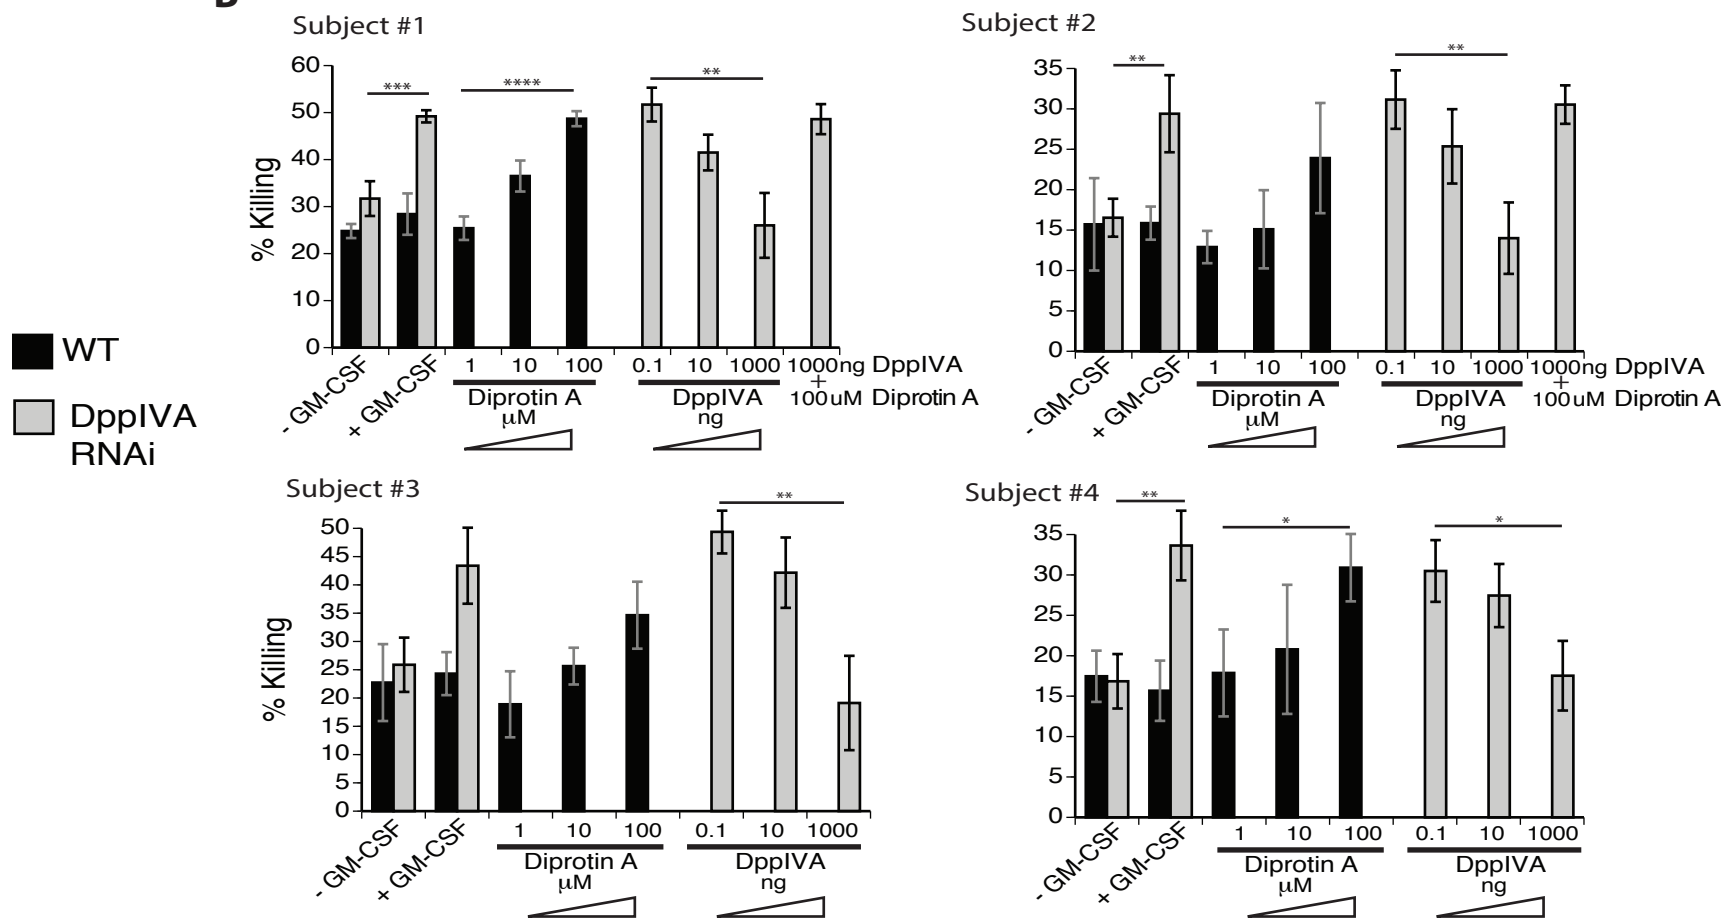

**Figure S4**

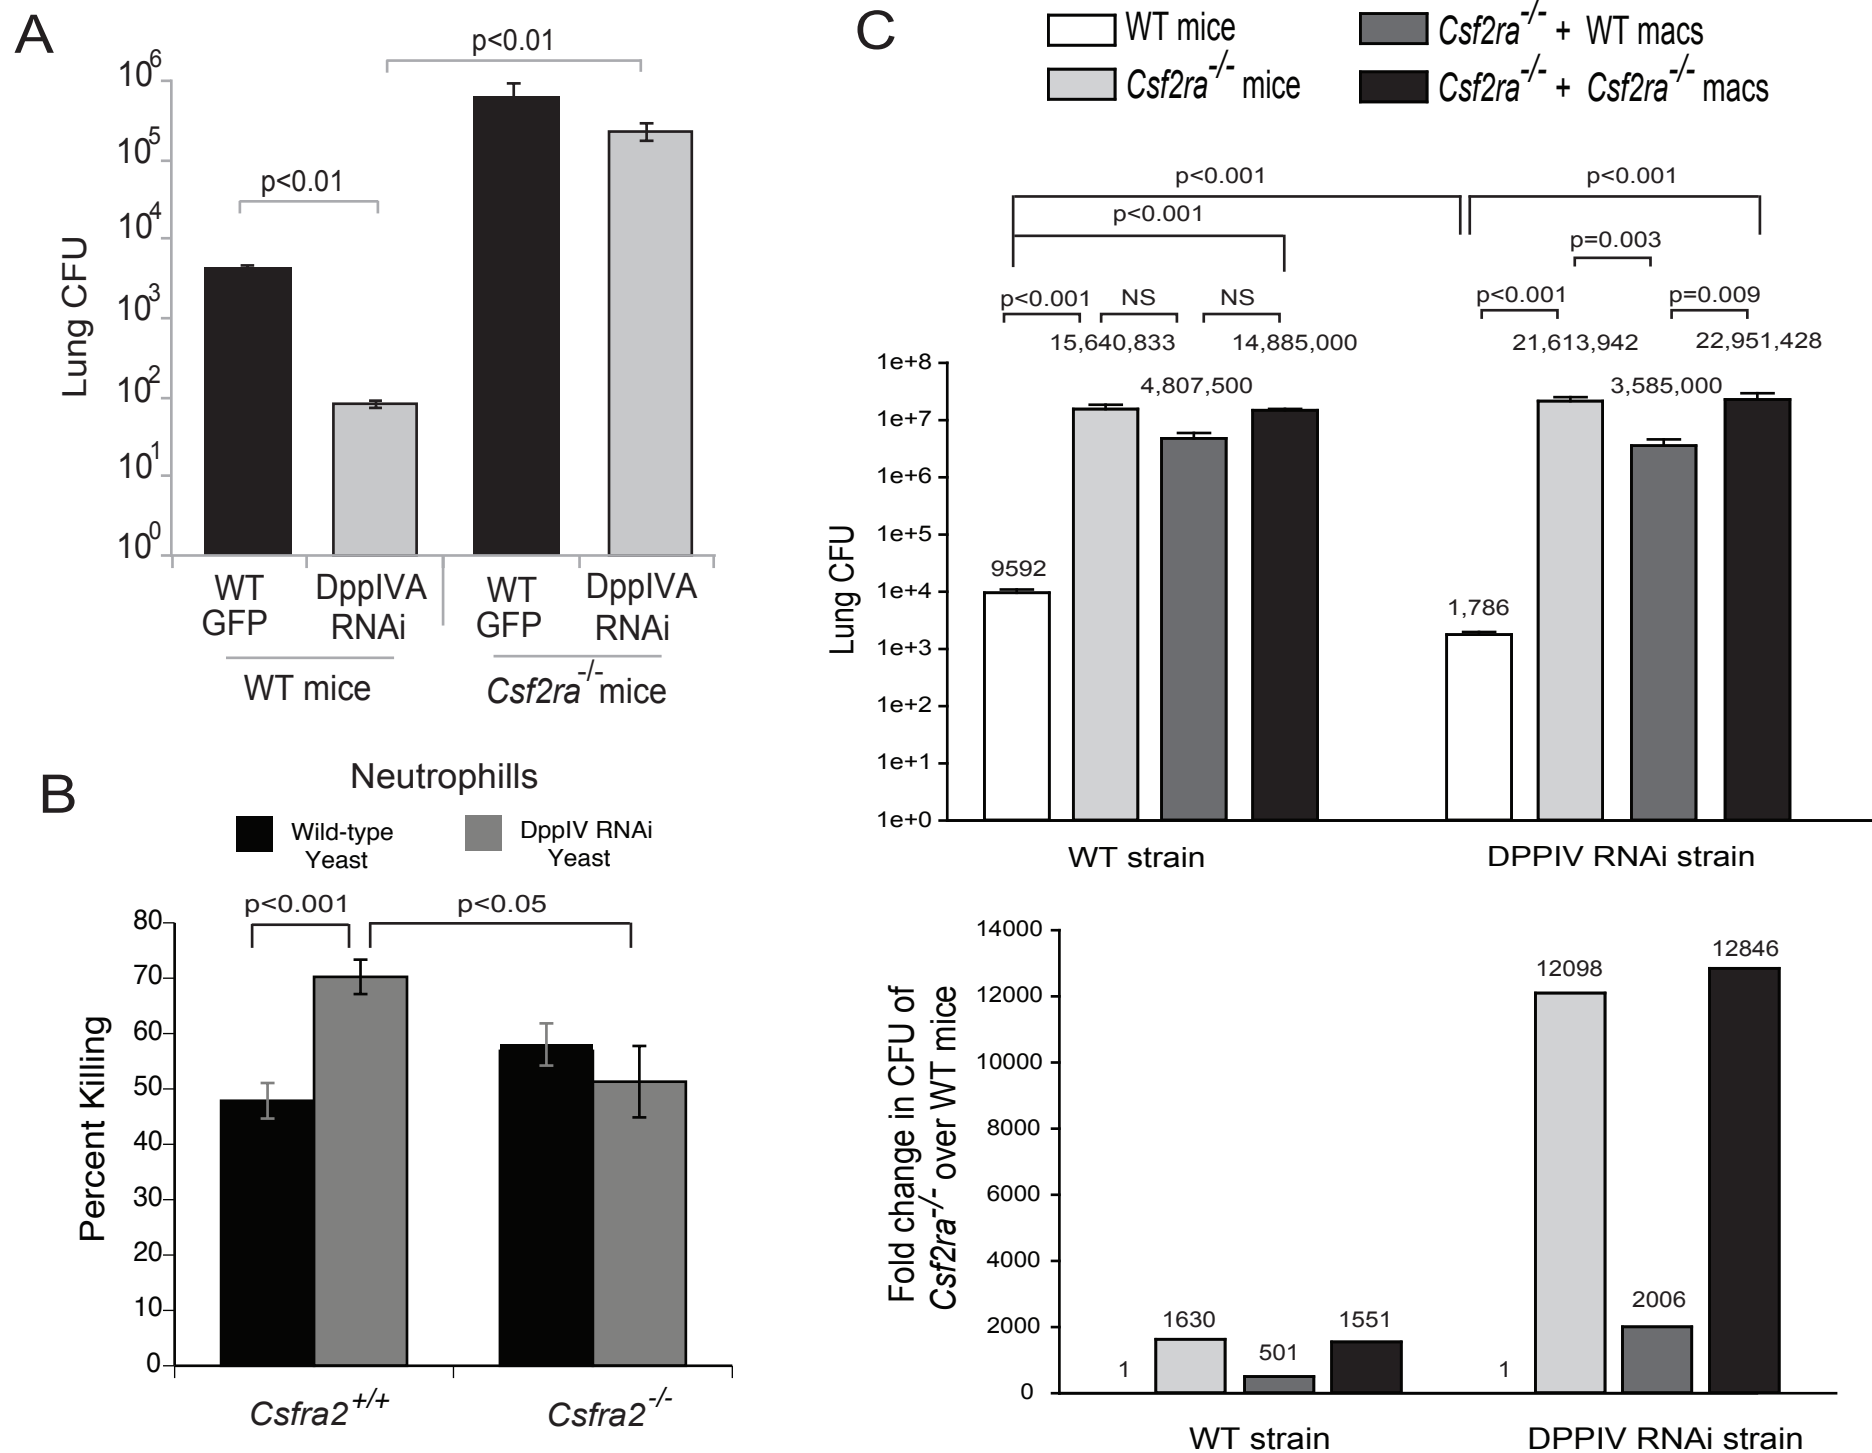

Figure S5

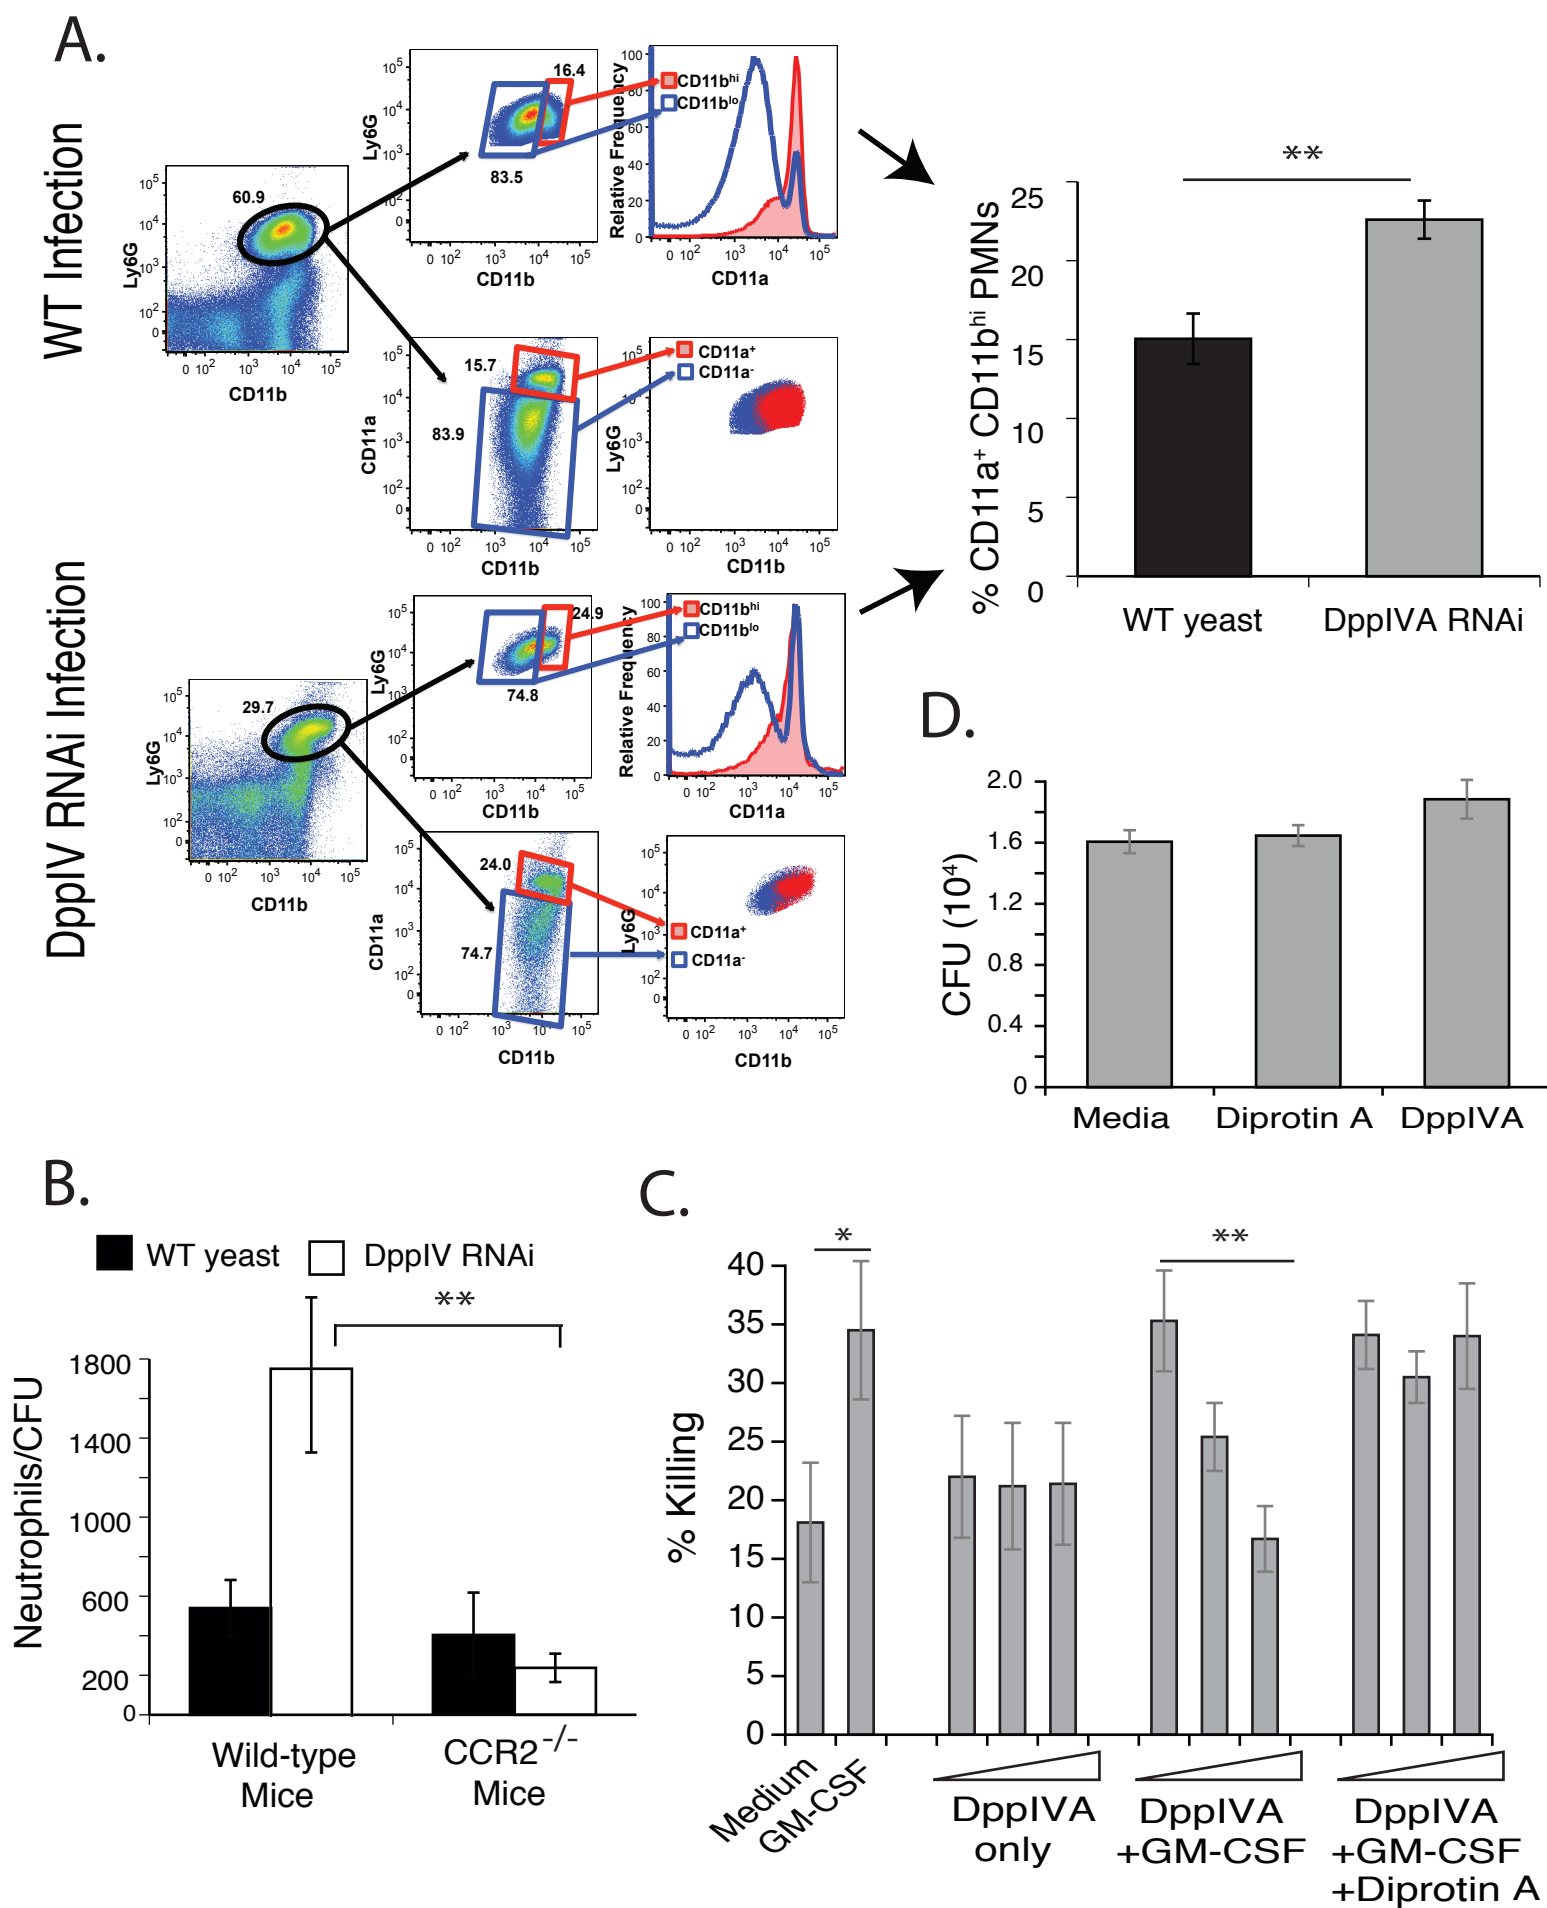

Figure S6

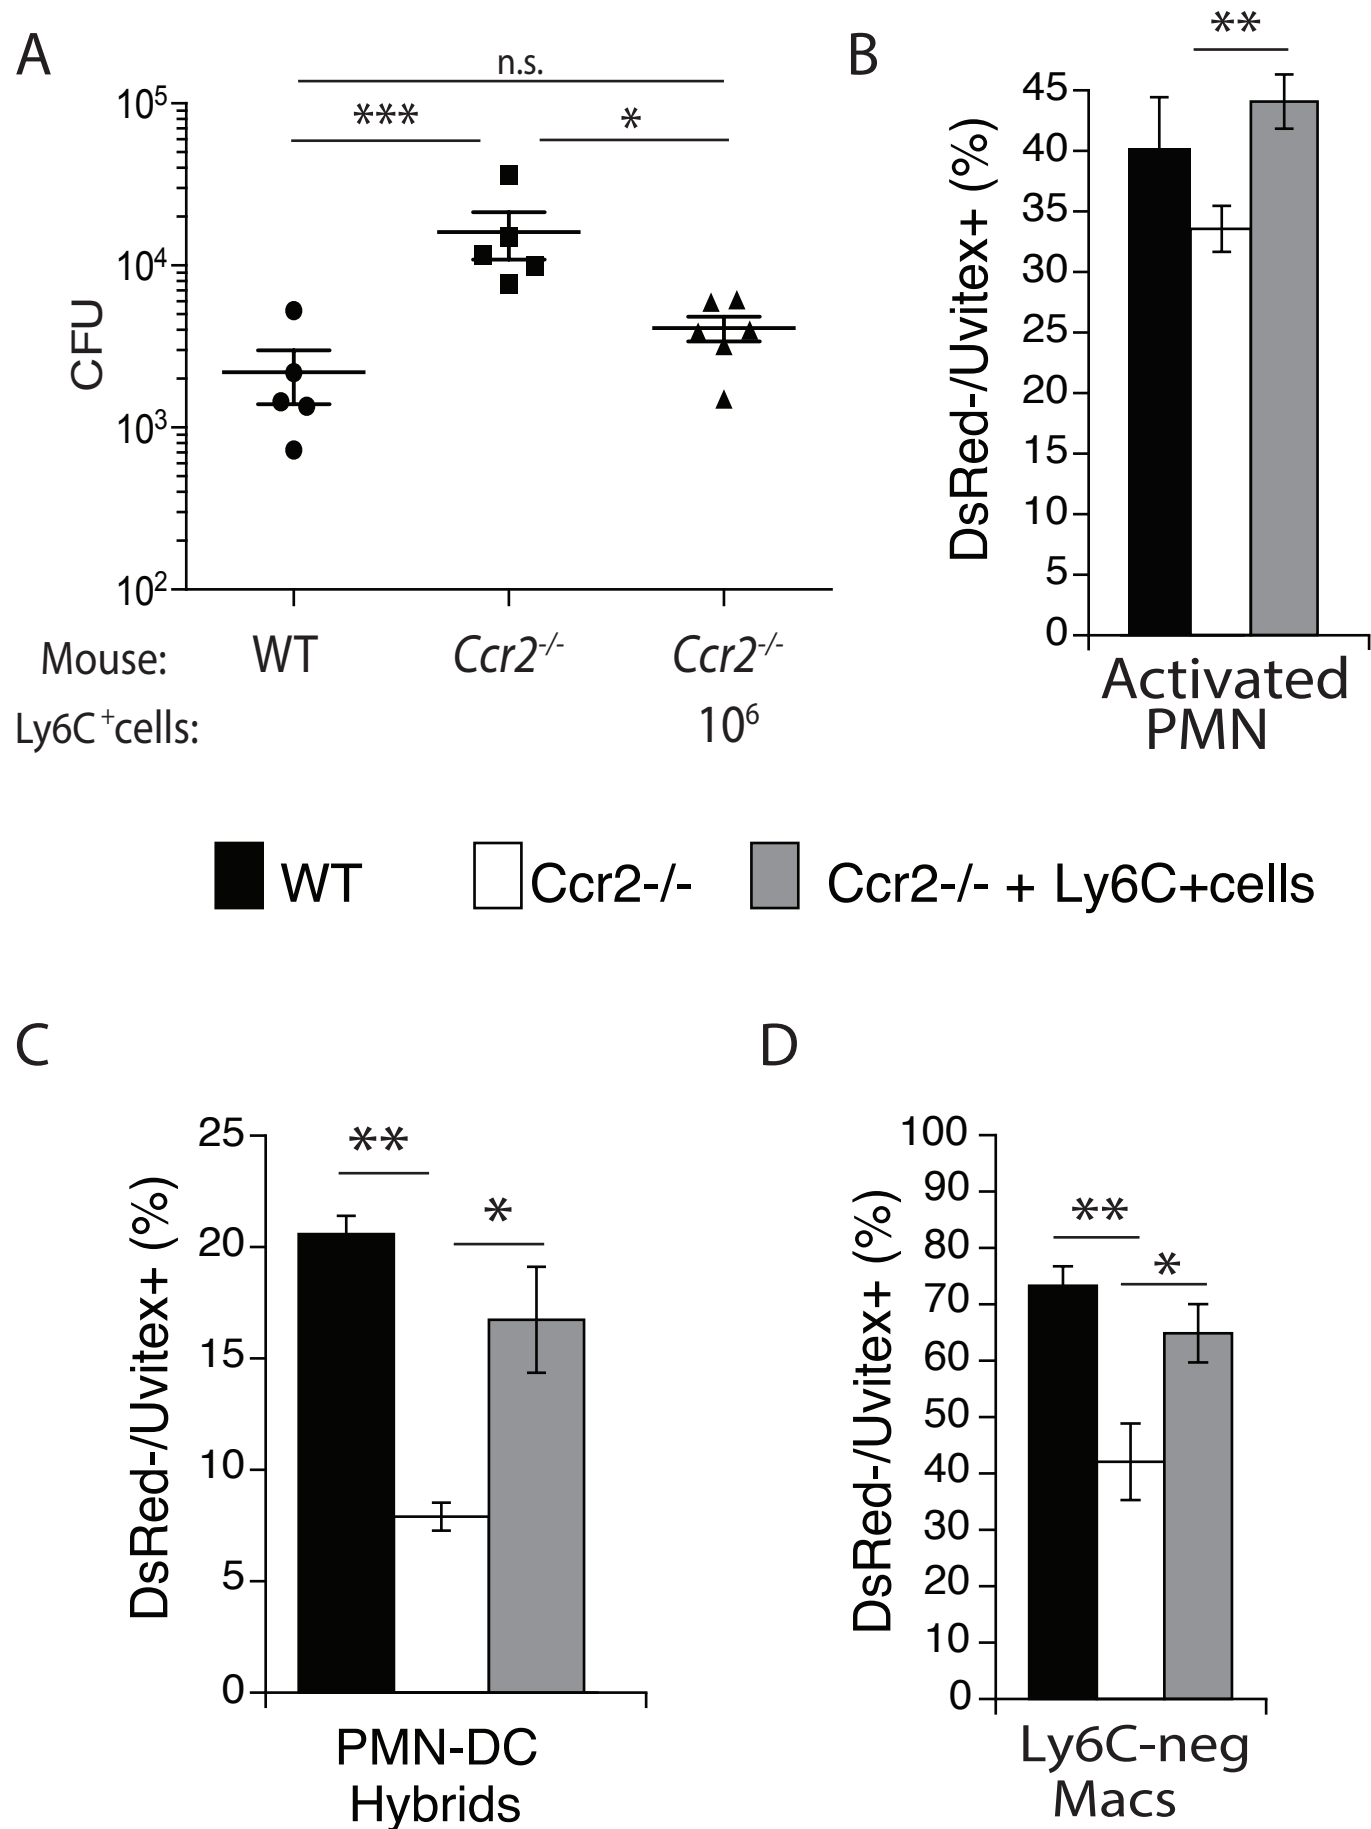

Figure S7

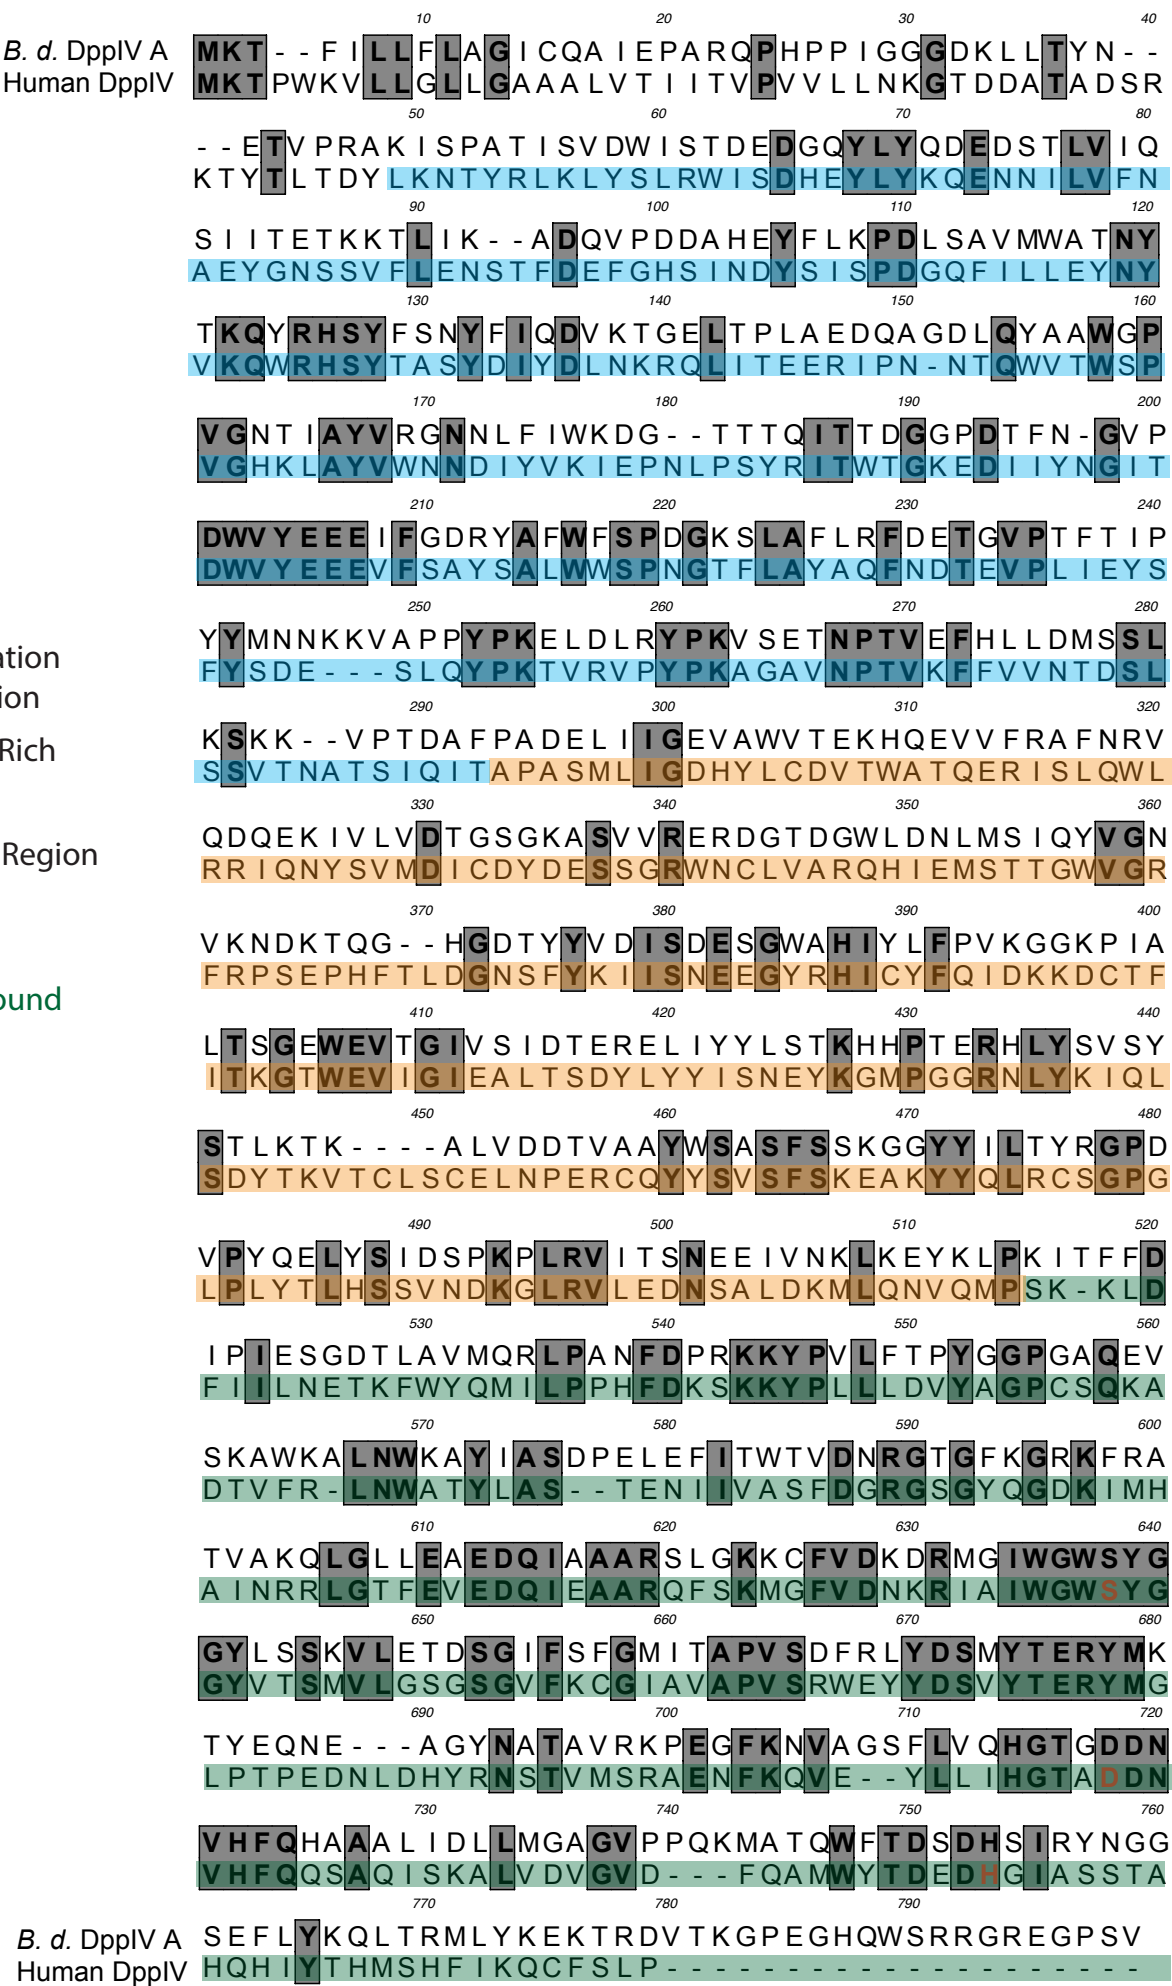

## SUPPLEMENTAL FIGURE LEGENDS

### Fig. S1. Chemokines that Recruit Ly6C<sup>hi</sup> cells are Up-regulated during Infection (related to Figures 1 & 2).

(A) CD26 expression in bone-marrow derived macrophages co-cultured *in vitro* with yeasts in a ratio of 1:1. Data are the mean  $\pm$  SEM of two technical replicates. (B) Binding of pre-immune and immune serum (1:64 dilution) to recombinant fungal DppIVA, measured by ELISA. Shown are two groups of mice that were immunized with either wild-type yeast or DppIVA-RNAi yeast as described in Supplemental methods. Data are mean  $\pm$  SEM of two technical replicates and representative of two experiments. (C) Recruitment of Ly6C<sup>hi</sup> cells to the lungs 3 days post-infection with wild-type or DppIVA RNAi yeast in mice that received GM6001 (or vehicle control) to inhibit MMP2. Data are mean  $\pm$  SEM of 5-10 mice per group. (D) CCL2, CCL7, and CCL12 transcript and protein levels in the lung 2 days post-infection. Transcript is fold increase vs. naïve measured by RT-PCR. Protein was detected by ELISA in lung homogenate. Data are mean  $\pm$  SEM of 5-10 mice/group. Data are representative of two experiments. (E) Transwell migration of Ly6C<sup>hi</sup> monocytes from murine bone marrow in response to intact or fungal DppIVA-cleaved C-C chemokines. Migration was quantified by flow cytometry after 16-24 hours incubation. Results are representative of two independent experiments. \* $p < 0.05$ , \*\* $p < 0.01$ , \*\*\* $p < 0.001$ , \*\*\*\* $p < 0.0001$

### Fig. S2. DsRed Reporter Strain Features and their use in Interrogating the Host: Pathogen Encounter (related to Figure 4).

(A) Expression of DsRed fluorescence correlated with CFU during killing of yeast with H<sub>2</sub>O<sub>2</sub> to compare wild-type (Fig. 4A) and DppIVA RNAi strains. Wild-type DsRed strain and DppIVA RNAi DsRed strain show similar features. The mean fluorescence intensity (MFI) and CFU is shown on left, and the percent of yeast positive for DsRed and considered living is shown on right. (B) TipDCs were generated from wild-type and *iNOS*<sup>-/-</sup> mice and the cells were co-cultured with DsRed reporter yeast. Nitrate levels in culture supernatant were measured after 24 hours of co-culture using the Griess reaction. ND, not done.

### Fig. S3. Activity of Human Macrophages and Neutrophils against Yeast *in vitro* (related to Figures 5 & 6).

(A) Blood monocyte-derived M $\phi$ s from two healthy subjects were tested for killing of wild-type and DppIV RNAi yeast upon co-culture for 24 hours *in vitro* with GM-CSF, recombinant DppIVA (10mg/ml), DiprotinA (100mM) alone or in combination. Effector to target ratio was 1:1. (B) Peripheral blood neutrophils from four healthy subjects were tested for growth inhibition of wild-type and DppIV RNAi yeast upon co-culture for 6 hours *in vitro* with GM-CSF, recombinant DppIVA, DiprotinA alone or in combination. Effector to target ratio was 10:1. Percent killing was assessed by CFU plating of yeast. \* $p < 0.05$ , \*\* $p < 0.01$ , \*\*\* $p < 0.001$ , \*\*\*\* $p < 0.0001$ .

### Fig. S4. The Role of GM-CSF in Macrophage Killing of Yeast *in vivo* (related to Figure 3).

(A) *Csf2ra*<sup>-/-</sup> (GM-CSF receptor-null) mice were infected with isogenic DppIVA-sufficient or -deficient yeast. Lung CFU were counted 7 days post infection. Data are the mean  $\pm$  SEM of 5-10 mice per group, and representative of 3 experiments. (B) Percentage of wild-type and DppIVA-deficient yeast killed after incubation with neutrophils from wild-type mice or *Csf2ra*<sup>-/-</sup> mice. Cells were obtained from five mice per group. Data are the mean  $\pm$  SEM and representative of 2 experiments. (C) Adoptive transfer of wild-type or *Csf2ra*<sup>-/-</sup> peritoneal M $\phi$ s into wild type or *Csf2ra*<sup>-/-</sup> mice infected with either wild-type or DppIVA RNAi yeast.  $0.5 \times 10^6$  cells were transferred into each recipient. Mice were sacrificed seven days post-infection. The numbers over each histogram bar represent CFU (upper graph) or fold-change in CFU relative to wild-type mice (lower), and are representative of three experiments.

### Fig S5. Activation and Action of Murine Neutrophils against Yeast (related to Figure 6).

(A) Analysis of neutrophil activation using CD11a in tandem with CD11b. Neutrophils (black gate: Ly6G<sup>+</sup> CD11b<sup>+</sup>) from mice were assayed 4d after infection for activation by gating CD11b<sup>hi</sup> neutrophils (top panels) or CD11a<sup>+</sup> neutrophils (bottom panels). CD11b<sup>hi</sup> neutrophils express more CD11a, and CD11a<sup>+</sup> neutrophils express higher CD11b (right panels). Determination of neutrophil activation using CD11a in tandem with CD11b show similar results as gating with CD11b alone; more neutrophils are CD11a<sup>+</sup> CD11b<sup>hi</sup> in mice infected with DppIVA RNAi vs. wild-type (far right panel, \*\* $p < 0.01$ ). (B) Ratio of neutrophils: yeast cells in lung tissue 7 days after infection. (C) The percentage of DppIVA RNAi yeast killed after culture for 6 hours with neutrophils and combinations of GM-CSF, recombinant DppIVA, and DiprotinA alone or together. Effector to target ratio was 10:1 \* $p < 0.05$ , \*\* $p < 0.01$ . (D) CFU of DppIV RNAi yeast after culture for 6 hours with only DppIVA or DiprotinA, in the absence of neutrophils.

### Fig. S6. Impact of Ly6C<sup>hi</sup> Monocytes on Leukocyte Killing of Yeast (related to Figures 1 and 6).

(A) Lung CFU were measured 7d after infection with DppIV RNAi yeast in wild-type or *Ccr2*<sup>-/-</sup> mice that received adoptive transfer of Ly6C<sup>+</sup> cells. (B-D). Killing of yeast was determined by quantifying the number of DsRed<sup>+</sup> yeast events among the

total yeast-associated events (Uvitex<sup>+</sup>) for each leukocyte population. Activated neutrophils (B) were defined as Ly6G<sup>+</sup> CD11a<sup>+</sup> CD11b<sup>hi</sup> CD11c<sup>-</sup>. Neutrophil-DC hybrids (C) were defined as Ly6G<sup>+</sup> CD11b<sup>+</sup> CD11c<sup>-</sup>. Ly6C-negative (neg) Mφs (D) were defined as Ly6C<sup>-</sup> CD11c<sup>+</sup> Ly6G<sup>-</sup> and distinguished from DCs by autofluorescent properties. \*p<0.05, \*\*p<0.01, \*\*\*p<0.001, n.s. p>0.05.

**Fig. S7. Whole Protein Alignment of the Primary Amino Acid Sequences of DppIV (related to Figure 7).** *B. dermatitidis* DppIV A (Gene ID: BDFG\_07406, Uniprot ID: T5BJB9) and human DppIV (Uniprot ID: P27487) sequences are compared, which are 34% identical and 51% similar as determined by NCBI blastp (protein-protein BLAST). Identical amino acids are bolded and boxed in gray.

## 2. SUPPLEMENTAL EXPERIMENTAL PROCEDURES

### *Mice*

Mice were housed and cared for according to guidelines from the University of Wisconsin Animal Care and Use Committee and the Department of Laboratory Animal Medicine, University of Cincinnati, accredited by the American Association for Accreditation of Laboratory Animal Care (Frederick, MD), who approved this work. Their guidelines are in compliance with Health and Human Services Guide for the Care and Use of Laboratory Animals and the Animal Welfare Act guidelines of National Institutes of Health.

### *Fungi*

*Blastomyces* yeast were taken in log-phase growth from 7H10 slants, suspended in PBS, aspirated through a 26-G needle, and passed through a 40 µm filter to reduce aggregation. In some experiments, yeast were heat-killed at 65°C for one hour in PBS. *Histoplasma* yeast were taken in log growth from HMM plates and suspended in PBS. Yeast CFU were counted from brain-heart infusion plates or *Histoplasma*-macrophage medium (HMM) (Sigma-Aldrich, St. Louis, MO) plates after five to seven days of growth at 37°C. Yeast growth assays were for 5 days in liquid HMM containing 100 units penicillin, and 100 µg streptomycin (Hyclone) shaking in flasks at 37°C. Growth was measured by OD600.

### *DppIV GLO Assay*

DppIV Glo-Protease assays were performed following the manufacturer's protocol (Promega, Madison, WI). *B. dermatitidis* yeast were grown in HMM liquid media with penicillin and streptomycin. Inoculated liquid cultures were grown for 24hr at 37°C shaking at 240 rpm before being passaged to a starting O.D. of A<sub>600</sub> 0.1. Every 24hr, O.D A<sub>600</sub> of each culture was taken and 1 mL aliquots were collected, centrifuged at 1.2 x g for 10 min., and supernatant filtered through a 0.22 µm filter and stored at -20°C.

### *Generation of GFP-sentinel silenced strains*

DppIV knockdown (RNAi) and control strains were engineered utilizing the *B. dermatitidis* GFP-sentinel system (Krajaeun et al., 2007). Two non-overlapping regions of DppIV (BDFG\_07406) were targeted for silencing. A 5' region of DppIV was amplified utilizing the following primers: 5'-GGGGACAAGTTTGTACAAAAAAGCAGGCT CCGCGTTTGTCACTCCACA-3' and 5'-GGGGACCACTTTGTACAAGAAAGCTGGGT AGGAGTATAAATGTCTTCA-3' and a 3' region of DppIV was amplified utilizing the following primers: 5'-GGGGACCACTTTGTACAAGAAAGCTGGGT CGGCGACACTTACTATGTTG-3' and 5'-GGGGACAAGTTTGTACAAAAAAGCAGGCT TCCTTGTCGACGAAGCATTT-3' from *B. dermatitidis* genomic DNA using either Elongase® (Invitrogen, Grand Island, NY) or Herculanase® (Agilent Technologies, Madison, WI). After gel purification, the amplified DNA from the 5' and 3' target regions of DppIV were separately cloned into the silencing plasmid pFANTAi via the attsites present on the amplicons (underlined region of primers) using the Gateway cloning system® (Invitrogen). These and other vectors were separately transformed into *Agrobacterium tumefaciens*. Then, utilizing *A. tumefaciens*-mediated transformation (Sullivan et al., 2002), the 26199-GFP strain was individually transformed with a non-silencing plasmid (pBTS4) to generate the non-silencing control strain; the pFANTAi plasmid to generate the GFP-silencing control strain; the pFANTAi-5' DppIVRNAi plasmid two independent times to generate the two independent 5' DppIVRNAi silenced strains; and the pFANTAi-3' DppIVRNAi plasmid to generate the 3' DppIVRNAi silenced strain. Transformants were selected on 3M plates containing 50µg/mL hygromycin B at 37°C. DppIV silenced transformants were initially identified by the loss of

GFP fluorescence and confirmed by reduction in extracellular DppIV activity using the DppIV-Glo Protease Assay (Promega, Madison, WI).

### ***DsRed strains***

Agrobacterium binary vector, pCAMDsRed#2 (Eckert et al., 2005), was obtained from the Fungal Genetics Stock Center plasmid collection (<http://www.fgsc.net>). The T-DNA region of this plasmid harbors the DsRed-Express gene (Clontech; Mountain View, CA) under the control of the *Aspergillus nidulans Gpd* promoter, and the *TrpC* terminator, together with the *E. coli hph* gene under the control of the *A. nidulans TrpC* promoter (Hyg<sup>r</sup>). *Agrobacterium*-mediated transformation (AMT) of *B. dermatitidis* strain, 26199, with pCAMDsRed#2 and selection for hygromycin resistance were done as described (Sullivan et al., 2002). For the DppIVA RNAi strain, which is already hygromycin resistant, AMT was accomplished by co-cultivation with two different *A. tumefaciens* strains - one harboring pCAMDsRed#2 and one harboring pCTS59. pCTS59 was generated by Gibson Assembly (New England Biolabs, Ipswich, MA; Cat. No. E2611) using the binary vector pFANTAI4 (Krajaeun et al., 2007) digested with *Bam*HI and *Pac*I, and PCR fragments for the *A. nidulans Gpd* promoter and the *Neomycin phosphotransferase (NPTII)* gene from transposon *Tn5*, which were amplified from the plasmid pBTS92 (Sullivan et al., 2002) using primer pairs tdsP858 (TTTCAGTAACGTTAAGTGGATCCTCAGAAGAAGCTCGTCAAG) plus tdsP859 (ACATCACCATGATTGAACAAGATGGATTG), and tdsP860 (GTTCAATCATGGTGTGATGTCTGCTCAAGCG) plus tdsP861 (GATAGTTTAAACCCTTAATTAAGTCGACCCATCCGGTGCT), respectively. Transformants were selected for growth on plates with 200 µg/ml G418. For both the wild-type and DppIVA RNAi strains, transformants were screened for DsRed expression using the BioRad Versadoc 5000 (Hercules, CA; Green LED, 605 nm filter). For the DppVIA RNAi strain about one in 50 of the G418<sup>r</sup> colonies were also DsRed-expressing (indicating co-transformation with both binary vector T-DNAs). For both the wild-type and the DppIVA RNAi strains, red fluorescent colonies were streaked on selection medium and isolated colonies were re-screened with the Versadoc, and analyzed by fluorescent microscopy and flow cytometry to confirm uniformly fluorescent cell populations.

### ***Treatment of mice with DppIV or MMP2 inhibitors***

Mice were treated with MMP2 inhibitor GM6001 or vehicle control as described in (Wüthrich et al., 2012), and infected i.t. with  $2 \times 10^4$  wild-type or DppIVA RNAi yeast. At 3 days post-infection, lungs were harvested and leukocytes were stained for monocyte and neutrophil markers. In some experiments, mice that were infected with wild-type yeast were treated daily with Sitagliptin (Cayman Chemical), diprotin A (Sigma). Sitagliptin-treated mice received 20 µL (10mg/mL) via intubation and 500 µL (10 mg/mL) via the intraperitoneal (i.p.) route. Diprotin A treated mice received 20 µL (4 mg/mL) via intubation and 500 µL (3.45mg/mL) i.p. Mice were analyzed for lung burden 7 days post-infection.

### ***Ly6C<sup>hi</sup> Cells Purification, Culture, and Adoptive Transfer***

Ly6C<sup>hi</sup> cells were purified from bone marrow using a 2-step purification on the AutoMACS system (Miltenyi, San Diego, CA). The first step negatively selects the unwanted cells while the second step positively selects for Ly6C<sup>hi</sup> cells. Bone marrow was collected from the femurs and tibias of wild-type or iNOS<sup>-/-</sup> mice and RBCs were lysed as above. To deplete neutrophils, the bone marrow suspension was mixed with biotinylated anti-Ly6G (clone 1A8). Lymphocytes were depleted using anti-Th1.2 (clone 30-H12) and anti-B220 (clone RA3-6B2) biotinylated antibodies because some lymphocytes are Ly6C<sup>+</sup>. Cells that bind biotinylated antibodies are removed from the cell suspension when the biotin binds to streptavidin beads (Miltenyi). The magnetic streptavidin beads are held in a column with the labeled cells while unlabeled cells flow through to a collection tube. In the second step, we positively selected for Ly6C<sup>+</sup> cells by adding biotinylated anti-Ly6C (clones AL-21 or HK1.4) to the cells remaining after the depletion in step 1. Ly6C<sup>+</sup> cells were positively selected in the second step using the method described above except that the cells attached to the beads were collected after washing. Enrichment of Ly6C<sup>+</sup> cells was confirmed by flow cytometry. Ly6C<sup>hi</sup> monocytes (CD11b<sup>+</sup>, CD11c<sup>-</sup>, Ly6C<sup>hi</sup>, Ly6g<sup>-</sup>) were >90% pure and viability was >98%. The purified Ly6C<sup>hi</sup> monocytes were used for *in vivo* and *in vitro* experiments.

Ly6C<sup>hi</sup> cell-derived macrophages and inflammatory DCs were differentiated from Auto-MACS sorted bone marrow Ly6C<sup>+</sup> cells in cRPMI with 20 ng/mL GM-CSF at 37° C. Adherent CD11b<sup>+</sup>, CD11c<sup>-</sup>, Ly6g<sup>-</sup> macrophages were obtained after 5-7 days of culture, and non-adherent CD11b<sup>+</sup>, CD11c<sup>+</sup>, Ly6g<sup>-</sup> inflammatory DCs were obtained after 10-14 days of culture. Ly6C leaves the cell surface as cells differentiate over time so was not used in characterization. Cell types were confirmed by flow cytometry. TipDCs generated from Ly6C<sup>hi</sup> derived inflammatory DCs produced nitric oxide and TNF-α in response to exposure to yeast (Fig. S2b and data not shown) as measured by Griess reaction (Nagano, 1999) and/or respective transcript, consistent with a TipDC phenotype (Serbina 2003)(Shi

and Pamer, 2011). To investigate yeast killing *in vitro* by TipDCs or Ly6C-derived macrophages, these cells were cultured with wild-type or DppIVA RNAi yeast for 24 hours at 37° C (in the absence of GM-CSF) at an effector to target ratio of 3:1. To measure killing by undifferentiated Ly6C<sup>hi</sup> monocytes, these monocytes (CD11b<sup>+</sup>, Ly6C<sup>hi</sup>, Ly6G<sup>-</sup>) were sorted to >99% purity from bone marrow using FACS Aria II Sorter (BD Bioscience) and cultured with yeast under the same conditions. Monocytes were purified using FACS because AutoMACS sorting of bone marrow contained some immature neutrophils; these neutrophils did not survive differentiation of inflammatory DCs and Mφs, as confirmed by flow cytometry.

For adoptive transfer into *Ccr2*<sup>-/-</sup> mice, 10<sup>5</sup> to 10<sup>6</sup> cells of Ly6C<sup>+</sup> populations derived *in vitro* were administered to mice i.t. by intubation in 20 µL of PBS. If Ly6C<sup>hi</sup> cells for transfer were elicited *in vivo*, “donor” mice received i.t. inoculation of 4 x 10<sup>5</sup> heat-killed yeast; on day four post-inoculation, lungs, regional lymph nodes and spleens were harvested and characterized as described (Wüthrich et al., 2012) for transfer of 10<sup>5</sup> to 10<sup>6</sup> cells per recipient.

### **Macrophages**

Bone marrow derived macrophages (BMDM) were differentiated using 10 ng/mL GM-CSF (Peprotech, Rocky Hill, NJ). After 7 days, BMDM were harvested by trypsinization of adherent cells. The phenotype of the cells is F4/80<sup>+</sup> CD11b<sup>hi</sup> CD208<sup>lo</sup> PDL2<sup>int</sup> CD301<sup>lo</sup>. For *in vitro* killing assays, BMDM were plated at 10<sup>5</sup> cells per well in 100µl cRPMI in a 96-well plate. Macrophages were activated with 10 ng/ml GM-CSF for 24h. The next day, media was changed, fresh GM-CSF was added and macrophages were added to yeast at a ratio of 1:1. In some assays, macrophages were treated with diprotin A (Enzo Lifesciences, Farmingdale, NY) or rDPPIV at the time of infection.

### ***Csfra2*<sup>-/-</sup> mouse experiments, including adoptive transfers of peritoneal macrophages**

Peritoneal macrophages were obtained by peritoneal lavage from mice using Hank's balanced salt solution (HBSS) (Corning, Cellgro). Peritoneal exudate was plated overnight in RPMI 1640 medium (HyClone, Logan, Utah) with 10% heat-inactivated (56°C for 30 min) fetal bovine serum (FBS) (Atlanta Biologicals, Norcross, GA), 100 units penicillin, and 100 µg streptomycin and cultured at 37°C and 5% CO<sub>2</sub>. Floating cells were removed by washing with HBSS, and adherent peritoneal macrophages were dissociated using enzyme-free cell dissociation buffer (Gibco Life Technologies, Grand Island, NY). For adoptive transfer studies, peritoneal macrophages were obtained as above, washed and re-suspended in HBSS with 0.1% FBS, and numbers transferred as described in the Methods.

### **Neutrophils**

Neutrophils were purified from the bone marrow of 6-8 week old wild-type mice. Red blood cells (RBCs) were lysed in 0.2% NaCl for 5 seconds, then neutralized with 1.2% NaCl. The suspension was filtered through a 40 mm mesh. Cells were separated using a Percoll density gradient with cells layered over 5 mL of 62% then over 2 mL of 80%. Cells were centrifuged for 30 min at 1000g at room temperature without braking. Neutrophils were collected at the 62/80 interface and washed twice in cRPMI. Purity was checked by flow cytometry and was greater than 95% in all experiments. Experimental wells contained 2.5x10<sup>5</sup> neutrophils, 2.5x10<sup>4</sup> yeast, 10 ng/mL GM-CSF, *Blastomyces* recombinant DppIV, and/or diprotinA in cRPMI. Cells were cultured for 6 hours at 37°C and 5% CO<sub>2</sub>. Neutrophils were lysed in distilled H<sub>2</sub>O and yeast washed in PBS before plating on BHI. Each condition had 6 to 8 replicates. The percent killing was defined as (1-(# of yeast in a condition/# of yeast without neutrophils)) x 100.

### **Flow cytometry**

Cells were washed with FACS buffer, fixed with 2% paraformaldehyde solution for 20 min, and washed and suspended in FACS buffer for analysis. Centrifugation was done at 1500 rpm for 5 min and 4°C in an Eppendorf 5825 centrifuge. Events were gated on FCS and SSC to exclude debris and LIVE/DEAD Fixable Yellow® (Molecular Probes, Grand Island, NY) negative cells to exclude dead cells. Alveolar macrophages were defined as CD11c<sup>+</sup>, CD11b<sup>+</sup>, Ly6g<sup>-</sup>, Mac3<sup>+</sup> and autofluorescent; neutrophils as CD11b<sup>+</sup> and Ly6g<sup>+</sup> (clone 1A8), CD11c<sup>-</sup>; dendritic cells (DCs) as CD11c<sup>+</sup>, CD11b<sup>+</sup> and Ly6G<sup>-</sup>; neutrophil-DC hybrids as Ly6G<sup>+</sup>, CD11b<sup>+</sup> and CD11c<sup>+</sup>; Ly6C<sup>hi</sup> monocytes as CD11b<sup>+</sup>, Ly6C<sup>hi</sup> and Ly6g<sup>-</sup>; TipDCs as CD11b<sup>+</sup>, Ly6C<sup>hi</sup>, CD11c<sup>+</sup>, Ly6g<sup>-</sup>, and expression of NOS2 and TNFα<sup>+</sup>; and inflammatory monocyte-derived phagocytes as, Ly6C<sup>+</sup>, CD11b<sup>+</sup>, CD11c<sup>+</sup> and Ly6G<sup>-</sup>; macrophages were distinguished from DCs in this population by autofluorescence (Geng et al., 2013; Misharin et al., 2013; Serbina and Pamer, 2006; Serbina et al., 2003; Zaynagetdinov et al., 2013). Activated neutrophils were measured as CD11b<sup>hi</sup>, Ly6g<sup>+</sup> (Kuijpers et al., 1991; van Eeden et al., 1999). Reactive oxygen species (ROS) were measured with dihydro-rhodamine 123 (DHR) (Sigma) 0.5 mg/mL in 500µL RPMI and 10% FBS with 2 x 10<sup>6</sup> cells in a 24-well plate at 37° C for 4 hours, unstimulated. TNF-α was measured with intracellular staining for 4 hours at 37° C in 500µL cRPMI

with  $2 \times 10^6$  cells in a 24-well plate. Antibodies were conjugated to biotin or the following fluorophores: FITC, PE, PerCP, PE-Cy7, APC, A700, or APC-Cy7, eFluor450 or BUV395 from BD Biosciences (San Jose, CA), eBiosciences (San Diego, CA) BioLegend (San Diego, CA) or Miltenyi. Yeast were identified by GFP or with 10 ng/mL Uvitex 2B (PolySciences, Inc., Warrington, PA). For *in vivo* analysis of yeast association with leukocytes, cells were permeabilized before staining with uvitex 2B. Yeast viability was measured by the fluorescence of DsRed. Data was collected on a LSRII cytometer (BD Biosciences) and analyzed using FlowJo software (Tree Star, Ashland, OR).

Lungs were processed by pressing them through a 40  $\mu$ m filter with the plunger of a 5-mL syringe. Homogenates were digested using 1 mg/mL Collagenase D (Roche, Nutley, NJ) and 10 ng/mL DNase I (Sigma) for 20 min. at 37°C. RBCs were lysed with ACK buffer and the remaining cells were washed with 2 mM EDTA and 0.5% BSA in PBS (FACS buffer). Markers, gating and instruments are described above.

### **Cell Migration assays**

To measure cell migration, 24-well plates and 5  $\mu$ m porous transwells (Corning, Tewksbury, MA) were coated with a 10  $\mu$ g/mL solution of fibrinogen (Sigma-Aldrich) and blocked with 2% BSA. When assaying migration of murine 300-19 cells transfected with human CCR2 (a gift of Bernhard Moser (Theodor-Kocher Institute, Bern, Switzerland),  $2 \times 10^5$  cells in cRPMI were loaded into each transwell, while the bottom chamber received 500  $\mu$ l of intact or cleaved chemokine resuspended in cRPMI. Migration of cells was allowed to proceed for 16-24 hours at 37°C in 5% CO<sub>2</sub>. Cell counts from the bottom well were determined by flow cytometry based on events in the appropriate FSC/SSC gate. To assay migration of primary, murine Ly6c<sup>hi</sup> cells, bone marrow was collected from C57BL/6 mice, RBCs were lysed, and  $10^6$  bone marrow cells in cRPMI were loaded into a transwell. The bottom chamber was loaded with chemokine and cells were permitted to migrate as above. Cells that migrated into the bottom chamber were stained for viability, CD11b, Ly6g and Ly6c. Ly6c<sup>hi</sup> cell counts in the chamber were assayed by flow cytometry based on CD11b, Ly6c<sup>+</sup>, Ly6g<sup>-</sup> events.

### **Microscopy**

Differential fluorescence microscopy was performed using an Olympus BX60 microscope. Images were captured with an Exi Aqua Camera (QImaging, Surrey, BC) and QCapture Pro 6.0 image software. Images were processed using Adobe Photoshop.

### **Immunization of mice:**

To assess whether DppIVA is expressed *in vivo*, we administered yeast to mice subcutaneously since infection with wild-type yeast is better controlled at this site. Mice received  $10^6$  live wild-type yeast or DppIVA RNAi yeast subcutaneously four times, two weeks apart. The final administration of yeast was given with incomplete freund's adjuvant. Mice were bled ten days after the last boost and analyzed for anti-DppIV antibody detection by ELISA.

### **ELISA**

After infection, mice were sacrificed and bronchoalveolar lavage fluid was collected by injecting and immediately collecting 1 mL of PBS. Lung homogenate supernatant was collected in total of 2 mL PBS after the lungs were ground through a 70  $\mu$ m filter via plunger, spun at 1500 rpm for 5 min, and supernatant removed. ELISA assays for CCL2, CCL12 (both from R&D, Minneapolis, MN) and CCL7 (Peprotech) was performed according to the manufacturer's protocol using 1:5 dilution of sample.

To detect antibody responses to fungal DppIVA expressed *in vivo* by yeast, sera from immune mice were assayed by ELISA. Microtiter wells were coated with 10 $\mu$ g/mL recombinant *B. dermatitidis* DppIVA protein, washed with buffer (PBS +0.05% Tween 20) and blocked with blocking buffer (PBS + 2% BSA) for 1 hour. After washing, wells were coated for 1 hour with 100 $\mu$ L of naïve, pre-immune serum, or serum from mice immunized with wild-type *B. dermatitidis* or DppIV A RNAi yeast as above. Sera were tested at 1:2 serial dilutions. Treated wells were washed with buffer and coated with anti-mouse horse-radish peroxidase antibody for 1 hour (1:1000 dilution). After washing, wells were treated with 3,3',5,5'-tetramethylbenzidine substrate and incubated until color change was observed. A stop solution of 1M HCl was then added to wells and A<sub>450</sub> was measured.

### **Recombinant DppIVA**

Expression of *B. dermatitidis* rDppIVA was performed using EasySelect*Pichia* Expression Kit (Invitrogen, Grand Island, NY). The DppIVA ORF was amplified from genomic DNA with primers

**JLL189:**GGCTGAAGCTGAATTCACCCATCATCATCATCATATTGAACCCGCGCGCCAGCC

**JLL188:**TTTTGTTCTAGAAAGCTGGCTTAAACGCTCGGCCCCCTCAC and cloned into the pPICZαA vector using a *PmlI* restriction site via Gibson assembly reaction following the standard protocol (New England Biolabs). A 6X-His tag (underlined) was included as well. *P. pastoris* was transformed with this vector and transformants were selected on LB Zeocin plates.

### RT-PCR

After infection, mice were sacrificed and lung tissue was collected in RNAlater (Qiagen, Valencia, CA). Lung tissue RNA was purified using a Qiagen midiRNA extraction kit following the manufacturer's protocol. cDNA was synthesized using iScript cDNA Synthesis Kit (Bio-Rad) following the manufacturer's protocol. Real-time PCR was performed with SYBR Green (Bio-Rad) and iCycler (Bio-Rad) with the following protocol: 95°C 3min., 40 cycles of 95°C 1min. and 60°C 1 min., 95°C 1min., 60°C 1 min., and for the melt curve 71 cycles of 60°C 10sec. The amount of transcript was normalized to 18srRNA. The following primers (IDT) were used:

**CCL2:** Jll238: TTAAAAACCTGGATCGGAACCAA, Jll239: GCATTAGCTTCAGATTACGGGT

**CCL7:** Jll244: CCAATGCATCCACATGCTGC, Jll245: GCTTCCCAGGGACACCGAC,

**CCL12:** Forward: CTTCCGGACGTGAATCTTCT, Reverse: AGTCCTCAGGTATTGGCTGG,

**18srRNA** Forward: CGCCGCTAGAGGTGAAATTCT, Reverse: CGAACCTCCGACTTTCGTTCT

**Mammalian CD26:** 10<sup>6</sup> BMDM were plated in a 12 well plate and stimulated with 10 ng/ml GM-CSF for 24 hours in RPMI media. The next day, media was changed, cells were restimulated with GM-CSF and infected with 10<sup>6</sup> *B. dermatitidis* yeast for 24 hours. RNA was extracted after elimination of genomic DNA using RNeasy Mini Kit (Qiagen) and cDNA was prepared using Reverse Transcription System Kit (Promega, WI) to assess mammalian DppIV expression in macrophages. A mammalian CD26-specific (proprietary) primer probe set for Taqman assay was obtained from Applied Biosystems (Mm00494549\_m1) spanning exon boundaries 20-21.

### Mass Spectrometry

Recombinant CCL-2, -7, and -12, and GM-CSF (Sigma) that was non-glycosylated and lacked methionine at the N-terminus, were incubated with recombinant *Blastomyces* DppIVA. One microgram of target was incubated with 10 ng of DppIVA in 20mM HEPES, pH 7.6, 40mM NaCl at 37°C for 0 to 6 hrs; 5mM diprotin A or 2% fetal bovine serum (FBS) was included in some reactions. Wild type yeast were cultured *in vitro* in HMM with 2% FBS containing 20 µg GM-CSF. After 72 hours, yeast were removed. All reactions were terminated by freezing on dry ice, and were kept frozen until immediately prior to mass spectrometric analysis at the UW biotechnology center.

**MALDI TOF analysis.** Protein samples were cleaned/concentrated using solid phase extraction C18 cartridges (ZipTip-C18, EMD Millipore, Billerica, MA) according to manufacturer's protocol, but eluted with 1µl solution of 60%Acetonitrile/39%H<sub>2</sub>O/1%TFA. Half of the protein sample (0.5µl volume) was directly deposited onto the Opti-TOF™ 384 well plate (Applied Biosystems, Foster City, CA) and re-crystallized with 0.4µl of matrix [5mg/ml of α-Cyano-4-Hydroxycinnamic acid in acetonitrile/H<sub>2</sub>O/TFA (70/30/0.1)]. Mass spectrum was acquired on a 4800 Matrix-Assisted Laser Desorption/Ionization-Time of Flight-Time of Flight (MALDI TOF-TOF) mass spectrometer (Applied Biosystems) scanning 5,000-40,000 Da mass range using 1000 shots acquired from 20 randomized regions of the sample spot at 3,800 intensity and 0.88V Detector Voltage Multiplier of OptiBeam™ on-axis Nd:YAG laser with 200Hz firing rate and 3 to 7ns pulse width in Positive Linear Mid Mass mode. External calibration with CytochromeC protein standard was performed to validate mass accuracy.

## References

- Eckert, M., Maguire, K., Urban, M., Foster, S., Fitt, B., Lucas, J., and Hammond-Kosack, K. (2005). *Agrobacterium tumefaciens*-mediated transformation of *Leptosphaeria* spp. and *Oculimacula* spp. with the reef coral gene DsRed and the jellyfish gene gfp. *FEMS microbiology letters* 253, 67-74.
- Geng, S., Matsushima, H., Okamoto, T., Yao, Y., Lu, R., Page, K., Blumenthal, R.M., Ward, N.L., Miyazaki, T., and Takashima, A. (2013). Emergence, origin, and function of neutrophil-dendritic cell hybrids in experimentally induced inflammatory lesions in mice. *Blood* 121, 1690-1700.
- Krajaejun, T., Gauthier, G.M., Rappleye, C.A., Sullivan, T.D., and Klein, B.S. (2007). Development and application of a green fluorescent protein sentinel system for identification of RNA interference in *Blastomyces dermatitidis* illuminates the role of septin in morphogenesis and sporulation. *Eukaryot Cell* 6, 1299-1309.
- Kuijpers, T.W., Tool, A.T., van der Schoot, C.E., Ginsel, L.A., Onderwater, J.J., Roos, D., and Verhoeven, A.J. (1991). Membrane surface antigen expression on neutrophils: a reappraisal of the use of surface markers for neutrophil activation. *Blood* 78, 1105-1111.
- Misharin, A.V., Morales-Nebreda, L., Mutlu, G.M., Budinger, G.R., and Perlman, H. (2013). Flow cytometric analysis of macrophages and dendritic cell subsets in the mouse lung. *American journal of respiratory cell and molecular biology* 49, 503-510.
- Nagano, T. (1999). Practical methods for detection of nitric oxide. *Luminescence* 14, 283-290.
- Serbina, N.V., and Pamer, E.G. (2006). Monocyte emigration from bone marrow during bacterial infection requires signals mediated by chemokine receptor CCR2. *Nature immunology* 7, 311-317.
- Serbina, N.V., Salazar-Mather, T.P., Biron, C.A., Kuziel, W.A., and Pamer, E.G. (2003). TNF/iNOS-producing dendritic cells mediate innate immune defense against bacterial infection. *Immunity* 19, 59-70.
- Shi, C., and Pamer, E.G. (2011). Monocyte recruitment during infection and inflammation. *Nat Rev Immunol* 11, 762-774.
- Sullivan, T.D., Rooney, P.J., and Klein, B.S. (2002). *Agrobacterium tumefaciens* integrates transfer DNA into single chromosomal sites of dimorphic fungi and yields homokaryotic progeny from multinucleate yeast. *Eukaryot Cell* 1, 895-905.
- van Eeden, S.F., Klut, M.E., Walker, B.A., and Hogg, J.C. (1999). The use of flow cytometry to measure neutrophil function. *Journal of immunological methods* 232, 23-43.
- Wüthrich, M., Ersland, K., Sullivan, T., Galles, K., and Klein, B.S. (2012). Fungi subvert vaccine T cell priming at the respiratory mucosa by preventing chemokine-induced influx of inflammatory monocytes. *Immunity* 36, 680-692.
- Zaynagetdinov, R., Sherrill, T.P., Kendall, P.L., Segal, B.H., Weller, K.P., Tighe, R.M., and Blackwell, T.S. (2013). Identification of myeloid cell subsets in murine lungs using flow cytometry. *American journal of respiratory cell and molecular biology* 49, 180-189.
